# Supplementary material
Source: publisher site journal article supplement (https://www.dovepress.com/article/432943)
Supplement: Supplementary file 1 [file get_supplementary_file.php]

## **Pre-phase data collection tools:**

**Supply 1:** Structure questionnaire with validated world health organization step-wise non-communicable disease and risk factors screening procedure tool.

### **Questionnaire:**

The aim of this study is to assess Integrating non-communicable disease comorbidity and risk factors with newly enrolled tuberculosis patients care in Hadiya zone health facilities, which provides evidence for policy development and provide information for tuberculosis patients, even for the community on early screening and integrate management.

### **Study participant selection**

After district health facilities selection from the Zone randomly, we included all of the newly enrolled TB patients in the TB care program until final sample size adequacy and the study participants were enrolled by consecutively for three months.

## **Part I: Participant Information Sheet**

### **Introduction**

Dear Participants, this PhD thesis questionnaire was developed by Mengistu Handiso for collecting information on the behalf of Wolaita University College of Medicine and Health Sciences public health department. It was translated into the local language/Amharic, and being a participant there is no incentive or unnecessary harm and you can stop at any time while you not comfortable. However, your information is crucial for this study to provide evidence for policy and the country at large.

### **Benefits and risks:**

It is also very important for you in order to screen NCDs and risk factors specifically your blood pressure and glucose for further treatment links and it will provide information on risk prevention and control strategy. However, the study will take time for you and may have a little discomfort while measuring B/P, height, Wiest Circumference and MUAC and blood sample taking but does not have any risk. There might be also some words that might be confusing so please ask me as we go through the information and I will take to explain.

**Confidentiality and right of participant:** All the responses given by you and results obtained will be kept confidential using a coding system whereby no one will have access to your response. Without permission from you, any part of this study will not be disclosed to a third person. You are not expected to give your name and your participation in this research is voluntary. You have full right to refuse to if you don't want to answer the question and discontinuous from participation at any time if you don't wish to continue. However, you may be asked and assessed continuously while you are following the treatment by the researcher's assistance. There will not be any negative consequences because of participating and not participating in the study. However, your participation in this study is very important for the achievement of the study. I hope you will participate in the study for the sake the benefit of the research result.

**Part II: - Informed Consent**

I have read this form or it has been read to me in the language I understand and I had the opportunity to ask questions and it has been answered satisfactorily. I understand that I can discontinue the interview without any problem. Therefore

**1. I agree to participate 2. I refuse to participate**

If the participant agrees to participate skip to the next page.

If no, skip to the next participant by writing the reasons for refusal \_\_\_\_\_

**Data collector**

Name:- \_\_\_\_\_ Signature: - \_\_\_\_\_ Date:- \_\_\_\_\_

**Checked by Supervisor**

Name:- \_\_\_\_\_ Signature:- \_\_\_\_\_ Date:- \_\_\_\_\_

**Background of questionnaire**

These data collection tools had four parts include sociodemographic characteristics part, knowledge and perception towards NCDs part, patients clinical review part and validated tool of WHO stepwise screening procedure.

For qualitative method in-depth interview guidelines and observation checklists were used. In quantitative component there are skipping questions and open ended question. So be careful and put the answer in space provided by × Mark

## I. Sociodemographic characteristics

| Sr.n                                                           | Variable                                          | Category                                                                                                                                     |
|----------------------------------------------------------------|---------------------------------------------------|----------------------------------------------------------------------------------------------------------------------------------------------|
| COD.A                                                          | Age in year                                       |                                                                                                                                              |
| COD.B                                                          | sex                                               | (0) male<br>(1) female                                                                                                                       |
| COD.C                                                          | Education                                         | (0) not read and/or not write<br>(1) primary<br>(2) secondary<br>(3) college and above                                                       |
| COD.D                                                          | Occupation                                        | (0) Government<br>(1) Non-government employee<br>(2) Self-employed<br>(3) farmer<br>(4) housewife<br>(5) Student<br>(6) other (Specify)----- |
| COD.E                                                          | Ethnicity                                         | (0) Amhara<br>(1) Oromo<br>(2) Hadiya<br>(4) kambata<br>(5) other (Specify)-----                                                             |
| COD.F                                                          | Religion                                          | (0) Orthodox<br>(1) Muslim<br>(2) Protestant<br>(3) Other (Specify)-----                                                                     |
| COD.G                                                          | Household income per month<br>in USD              |                                                                                                                                              |
| COD.H                                                          | Area /resident                                    | (0) Urban<br>(1) semi- urban<br>(2) rural                                                                                                    |
| COD.I                                                          | Availability of shelter                           | (0) no<br>(1) yes                                                                                                                            |
| COD.J                                                          | Availability of fuel or<br>electricity            | (0) no<br>(1) yes                                                                                                                            |
| COD.K                                                          | Availability of pipe<br>water/clean water         | (0) no<br>(1) yes                                                                                                                            |
| COD.L                                                          | Family size                                       |                                                                                                                                              |
| COD.M                                                          | Marital status                                    | (0) single<br>(1) married<br>(2) divorced<br>(3) widowed<br>(4) Cohabited                                                                    |
| <b>II .Knowledge of NCD and risk factors among TB patients</b> |                                                   |                                                                                                                                              |
| COD1.                                                          | Do you know the common<br>comorbid NCD with of Tb | 0)No (1) Yes                                                                                                                                 |

|       |                                                            |                                                                                                                                                                                                             |
|-------|------------------------------------------------------------|-------------------------------------------------------------------------------------------------------------------------------------------------------------------------------------------------------------|
| COD2. | If yes , which of them are                                 | 1. HPN (0) No (1) yes<br>2. Heart disease (0) No (1) yes<br>3. DM (0) No (1) yes<br>4. COPD (0) No (1) yes<br>5. Cancer (0) no (1) yes                                                                      |
| COD3. | Do you know Risk factors of NCD?                           | 0)No (1) Yes                                                                                                                                                                                                |
| COD4  | If yes, what are                                           | 1. Smoking (0) No (1) yes<br>2. Alcohol (0) No (1) yes<br>3. Obesity (N)o (1) yes<br>4. Poor Physical exercise( No) (1) yes<br>5. Poor diet (0)No (1) yes<br>6. Family history (No) (1) yes                 |
| COD5. | Do you know NCDs are comorbid with TB                      | (0) No (1) yes                                                                                                                                                                                              |
| COD6  | Have you ever been screened/dx for NCD                     | (0)No (1) yes )                                                                                                                                                                                             |
| COD7  | Have you ever heard that ncd risk factors comorbid with TB | 0)No (1) yes                                                                                                                                                                                                |
| COD8  | Can we control NCDs disease ?                              | (0)No (1) yes                                                                                                                                                                                               |
| COD9  | From where/who heard about NCDs                            | 0 health professionals<br>(1) friends<br>(2) family /relatives<br>(3) social medias<br>(4) others                                                                                                           |
| COD10 | Do you know treatment side effect?                         | 0)No (1) yes                                                                                                                                                                                                |
| COD11 | From which methods can we control NCDs ?                   | 1. Don't Smoke (0) No (1) yes<br>2. Don't alcohol use (0) No (1) yes<br>3. Controlling Obesity (N)o (1) yes<br>4. Physical exercise( No) (1) yes<br>5. Diet (0)No (1) yes<br>6. Family history (No) (1) yes |
| COD12 | Is there any treatment for NCD                             | (0 No (1) Yes                                                                                                                                                                                               |

| <b>III. Patient clinical information/medical review format</b> |                                              |                                                                                                |
|----------------------------------------------------------------|----------------------------------------------|------------------------------------------------------------------------------------------------|
| SR.N                                                           | Variable                                     | Category                                                                                       |
| COD1                                                           | Types of TB                                  | 0)PTB<br>1)EPTB                                                                                |
| COD2                                                           | Health seeking time                          |                                                                                                |
| COD3                                                           | TB treatment initiation time after diagnosis |                                                                                                |
| COD4                                                           | Treatment category                           | 0) New<br>1)Retreatment                                                                        |
| COD5                                                           | Already diagnosed NCDs                       | 0)family history<br>1 DM<br>2 HPN<br>3 cancer<br>4 COPD (specify)_____<br>5 CVD(Specify) _____ |

### VI : WHO STEPWISE NCDs and risk screening questions

Have you ever been diagnosed with any of the following disease?

If any of the above answer is yes, kindly guide the patient about the treatment and appropriate treatment facility

|              |               |          |        |                             |        |
|--------------|---------------|----------|--------|-----------------------------|--------|
| Hypertension | Heart Disease | Diabetes | Stroke | Chronic Respiratory Disease | Cancer |
| Yes/No       | Yes/No        | Yes/No   | Yes/No | Yes/No                      | Yes/No |

#### IV. NCD Risk Determinant Questionnaire-Stage I

| Question                                                                                                                               | Options                        | Score | Record the score     |
|----------------------------------------------------------------------------------------------------------------------------------------|--------------------------------|-------|----------------------|
| 1. What is your age (in completed years)?                                                                                              | 20-34 years                    | 0     | <input type="text"/> |
|                                                                                                                                        | 35-49 years                    | 2     |                      |
|                                                                                                                                        | More than equal to 50 years    | 4     |                      |
| 2. Do you smoke?<br>If yes, do you smoke daily?<br>If no, have you ever smoked?                                                        | Never                          | 0     | <input type="text"/> |
|                                                                                                                                        | Ever smoked or sometimes smoke | 1     |                      |
|                                                                                                                                        | Daily                          | 2     |                      |
| 3. Have you ever taken tobacco such as Gutkha, Khaini etc.?<br>If yes, do you use tobacco daily?<br>If no, have you ever used tobacco? | Never                          | 0     | <input type="text"/> |
|                                                                                                                                        | Ever taken or take sometimes   | 1     |                      |
|                                                                                                                                        | Daily                          | 2     |                      |
| 4. Have you ever taken alcohol?<br>If yes, do you take alcohol daily?<br>If no, have you ever taken alcohol?                           | Never                          | 0     | <input type="text"/> |
|                                                                                                                                        | Ever taken or take sometimes   | 1     |                      |
|                                                                                                                                        | Daily                          | 2     |                      |
| 5. How many days in a week do you consume fruits?                                                                                      | More than equal to 5 days      | 0     | <input type="text"/> |
|                                                                                                                                        | Less than 5 days               | 1     |                      |
| 6. How many servings of vegetable do you consume in a day?                                                                             | More than equal to 3           | 0     | <input type="text"/> |
|                                                                                                                                        | Less than 3                    | 1     |                      |
| 7.a Do you daily do moderate (in which your only your heart beat                                                                       | Moderate to vigorous physical  | 0     | <input type="text"/> |

|                                                                                                                                     |                                                             |   |                          |
|-------------------------------------------------------------------------------------------------------------------------------------|-------------------------------------------------------------|---|--------------------------|
| fastens like climbing stairs, cycling, brisk walking) or<br>b. vigorous (in which your heart beat fastens and you become breathless | activity for more than equal to 10 min                      |   | <input type="checkbox"/> |
|                                                                                                                                     | Moderate to vigorous physical activity for less than 10 min | 2 |                          |
| 8. Do any of your parents or brother or sister has history of high blood pressure, diabetes, or heart disease?                      | No                                                          | 0 | <input type="checkbox"/> |
|                                                                                                                                     | Yes                                                         | 2 |                          |
| 9. Waist circumference (in cm):<br>_____<br>_____                                                                                   | Less than 72/78                                             | 0 | <input type="checkbox"/> |
|                                                                                                                                     | 72-79/78-89                                                 | 2 |                          |
|                                                                                                                                     | More than equal to 80/90                                    | 4 |                          |

Note: If the total score is more than 8, then move to next part

#### V. Measurements: Stage II

| Measurements                                                                                                            | Options                    | Score | Record the score         |
|-------------------------------------------------------------------------------------------------------------------------|----------------------------|-------|--------------------------|
| 1. Blood Pressure<br>1 <sup>st</sup> Reading: _____<br>2 <sup>nd</sup> Reading: _____<br>3 <sup>rd</sup> Reading: _____ | Less than 140/90           | 0     | <input type="checkbox"/> |
|                                                                                                                         | 140-160/90-100             | 2     |                          |
|                                                                                                                         | More than equal to 160/100 | 4     |                          |
| 2. Body Mass Index<br>Height (in cm): _____<br>Weight (in Kg): _____                                                    | Less than 23               | 0     | <input type="checkbox"/> |
|                                                                                                                         | 23.0-24.9                  | 2     |                          |
|                                                                                                                         | More than equal to 25      | 4     |                          |

Note: If the total score is more than to 12 refer the patient to NCD clinic for DM and HPN

**Supply 2:** Interview guidelines and observation check list of integrating NCDs care among tuberculosis patients

**A. Observation check list of NCDs care in tuberculosis patients**

|          | <b>Compliance with NCDs guideline</b>                                                                                   | <b>Yes</b> | <b>No</b> |
|----------|-------------------------------------------------------------------------------------------------------------------------|------------|-----------|
| <b>1</b> | Does TB Assessed for chronic patients?                                                                                  |            |           |
| <b>2</b> | Does patients Offer for blood (venous) fasting sugar levels and HPN                                                     |            |           |
| <b>3</b> | Did you Screen NCDs risk                                                                                                |            |           |
|          | <b>Compliance with NCDs diagnosis guideline</b>                                                                         |            |           |
| <b>4</b> | what about blood (venous) fasting sugar levels coverage of patients with suspected NCDs                                 |            |           |
| <b>5</b> | Does sample repeatedly requested from patients that test negative?                                                      |            |           |
| <b>6</b> | Did you request additional sample from laboratory for additional testing and repeat testing                             |            |           |
|          | <b>Health professional experience</b>                                                                                   |            |           |
| <b>1</b> | Did the HCW's understand and interpret Tb symptoms?                                                                     |            |           |
| <b>2</b> | Did the staff trained on blood (venous) fasting sugar levels and new diagnosing algorism?                               |            |           |
| <b>3</b> | Did the HCW'S knowledgeable on treatment?                                                                               |            |           |
| <b>4</b> | What about the implementation of new diagnostic algorism?                                                               |            |           |
| <b>5</b> | What about HCW's attitude in following up on laboratory test?                                                           |            |           |
|          | <b>Patients flow and physical infrastructure system</b>                                                                 |            |           |
| <b>1</b> | Did the patients have flow system in the clinics?                                                                       |            |           |
| <b>2</b> | Did you have adequate infrastructure to collect sputum?                                                                 |            |           |
| <b>3</b> | Did the patients have privacy?                                                                                          |            |           |
| <b>4</b> | Did you have any communication mechanisms of laboratory result to the facilities and to the patients?                   |            |           |
| <b>5</b> | Did the system link patient tracing and treatment?                                                                      |            |           |
| <b>6</b> | Did the system provide adequate resource for patient tracing (telephone, locating home and accessing patients address)? |            |           |
|          | <b>Patient's engagement</b>                                                                                             |            |           |
| <b>1</b> | Did the patients engaged in care and after provision of education?                                                      |            |           |
| <b>2</b> | Did you provide follow up appointment for patients to access laboratory results                                         |            |           |
| <b>3</b> | Did you provide follow up appointment for patients to begin therapy                                                     |            |           |
|          | <b>Quality assurance of the system</b>                                                                                  |            |           |
| <b>1</b> | Did the laboratory request form completed?                                                                              |            |           |
| <b>2</b> | Did you collect patients' locator information to facilitate tracing attempt?                                            |            |           |
| <b>3</b> | Did you have unique identifier linking laboratory results to the patients?                                              |            |           |



## **B. Key informants In-depth interview question/guideline**

Sex-----Age-----year of experience\_\_\_\_\_ type of position-----

How many Tb NCD comorbid patients are in your organization? \_\_\_\_\_

How many comorbid TB and NCD patients were identified by bidirectional screening of both diseases \_\_\_\_\_?

### **I. Establish mechanisms for collaboration**

1. Is there any joint coordination established with relevant stakeholders in your regions, explain?
2. Is There TB surveillance among NCD patients in your settings? if so explain
3. Is there NCD surveillance among Tb patients in your settings? if so explain it
4. Do you Conduct monitoring and evaluation of collaborative NCD and TB activities? How?

### **II. Detect and manage TB in patients with NCDs**

1. Is there any Intensify detection of TB among people with NCD? How?
2. Is there TB infection control in healthcare settings where NCD is managed? If so what?
3. Do you have high-quality TB treatment and management in people with NCD? So what?

### **III. Detect and manage NCD in patients with TB**

1. Is there any Screened TB patients for NCDs? , if so that what about it?
2. Do you have high-quality NCD management among TB patients? If so what you are going that?

### **A list of questions about important issues when integrating NCD services on Tb program**

1. How effective and safe will it be to use an Integration service to perform a specific task? interms of quality of services; increased awareness and improved health status, lower cost per visit, satisfactory health status, hours delivery care, number of appointments made and kept
2. Is Integration services likely to be regarded as acceptable by health workers and their clients and communities?

Provoke: In line with Satisfaction, Intent to continue use, perceived appropriateness, perceived Fit within organizational culture, perceived positive or negative effects on the organization

3. Is Integration service considered relevant by the community? How?
4. What tasks and activities should take on for integration?
5. What is most feasible for the health system to integrate services?
6. When and where will integration deliver and how much workload will it require?
7. What kind of skills and training will the integration need when performing specific tasks?
8. What type of health system support will the integration require when performing the task?
9. How much will it cost to use integration to perform the task?
10. Where is the best place in the HCS system to implement (or initiate) integration of TB and NCDs?

Key points: Access to medicines; changing of clinic schedule; managing multiple information system, waiting time; cost related to services and time saving; and medicine availability

Summary points: Training requirements, health systems support, work location, workload, and programme costs.

### **C. In-depth interview guideline and questionnaire for Tuberculosis NCD comorbid patients**

#### **I. Socio demographic variables:**

Age-----Sex-----Educational status---\_\_\_\_\_Marital status-----  
occupation\_\_\_\_\_

#### **II. Medical variables**

1. Types of TB\_\_\_\_\_ (PLTB / EPTB)
2. Treatment phase \_\_\_\_\_ (intensive / Continuous)
3. What types of comorbid disease do you have currently?
  - a. CVD(specify)
  - b. COPD(Specify)
  - c. DM( specify)
  - d. HPN
  - e. Substance use( alcohol/tobacco smoke or both
  - f. Nutritional problem( obese, overweight, undernutrition)

### **Post phase In-depth interview guidelines:**

#### **A. Patients interview guidelines after implementing screening for integration**

- Q1. How do you see the integration and its pathway?
- Q2. What do you think the good to fit with an individual value (relation, privacy, and confidentiality) for intervention?
- Q3. What is your understanding the coherence of intervention and service delivery?
- Q4. What is your Perceived effectiveness on the availability of the quality of services; increased awareness and improved health status?
- Q5. Comfort with sitting arrangement, freedom of movement; making discussions, fixing clinic appointments and medicine adherence
- Q6. What do you think about implementing this integration related to waiting time; cost related to services and time saving; and medicine availability?
- Q7. How do you see IMPLEMENTING INTEGRATION to Transport costs, distance, access to medicines; changing of Clinic schedule; managing multiple information systems?

#### **B. Challenges/weakness and opportunity/ strength**

What factors affect this integration implementation?

What things to be done to overcome this problem?

What factors are facilitators/opportunities, while implementing this integration?

Provoke: Simplicity of screening test, Short waiting time for screening and treatment, Relevance, Commitment and support of medical coordinator, Good coordination with a partner

What Positive experiences and Negative experiences faced when implementing this integration?  
 For example, (reaction with test, medical supplies, cost, attitude with HCWs, simplicity of test, privacy, waiting time, communication and referral/linkage)

## Codebooks:

Supply3: Codebooks of tuberculosis and non-communicable diseases integration challenges and opportunities

| <b>Codebook 1 : TB and NCDS integration challenges</b> |                                                               |                                                   |                                                                                                                                                                                                              |
|--------------------------------------------------------|---------------------------------------------------------------|---------------------------------------------------|--------------------------------------------------------------------------------------------------------------------------------------------------------------------------------------------------------------|
| <b>Code</b>                                            | <b>Definition</b>                                             | <b>Purpose/Meaning of code</b>                    | <b>In vivo description</b>                                                                                                                                                                                   |
| 1. Absence of medical equipment                        | Participants describe the availability of medical equipment   | Identifying the availability of medical equipment | I faced absence of diagnostic materials for diabetes mellitus, high blood pressure, ECG, CT scan and Waist circumferences measurement                                                                        |
| 2. Lack of skill                                       | Respondents describe their skill and knowledge of integration | Identifying skill and knowledge training          | I was screened for only TB, however I suffered by heart disease and it complicate my treatment."                                                                                                             |
| 3. Drugs and laboratory services not free              | Participants describe their services                          | Identifying drug and lab test availability        | The price of a bottle of insulin is not possible to pay it for patients                                                                                                                                      |
| 4. Absence of feedback and referral system             | Participants describe the program communication system        | Finding feedback and referral system              | Tuberculosis data is reported by senior officials on a regular base, however, there is an interruption and weak supportive supervision with feedback on diabetes mellitus and hypertension surveillance data |
| 5. Lack of record and reporting system                 | Participants describe record and report system                | Identifying record and reporting system           | I think these problems can be solved if and only if the routine data collection or surveying and report mechanism developed on patients registration format                                                  |
| 6. Lack of cooperative integration                     | Respondents explain integration                               | Identifying cooperative integration               | The organizations are not focused on an integrational report system                                                                                                                                          |

|                                                      |                                                                   |                                                 |                                                                                                                                               |
|------------------------------------------------------|-------------------------------------------------------------------|-------------------------------------------------|-----------------------------------------------------------------------------------------------------------------------------------------------|
| 7. Shortage of supporting agencies                   | Participants describe the availability of supporting organization | Identifying the presence of supporting agencies | TB was detected and managed by challenge TB and Rich TB program , however there is no supporting organization for NCDs                        |
| 8. Lack of linkage and referral system               | Participants describe their service communication                 | Identifying linkage and referral system         | Because of the unavailability of the system just like tuberculosis, the patient reappears to the outpatient service for perverted card access |
| 9. Shortage of skilled focal person                  | Participants describe their focal person skill                    | Identifying skilled focal person presence       | Making a better professional classification as a focal person brings acceptance                                                               |
| 10. Absence of early detection and management system | Participants describe the availability of early detection         | Identifying early detection and management      | If I was screened early for TB, I did not suffer or delay treatment."                                                                         |
| 11. Lack of trained health worker                    | Participants describe their health worker skill                   | Identifying trained health workers              | By assigning a trained professional as a focal person for both programs, quality will be improved                                             |
| 12. Increased work load                              | Participants describe their work load                             | Detecting health workers work overload          | The HCWs believed this intervention increases the workload because there is no awareness and training.                                        |
| 13. Absence of awareness creation                    | Participants describe their awareness                             | Identifying participants awareness              | Even assigned TB and NCD focal persons are not aware to communicate the work and integrate the report                                         |

**Codebook2 : TB and NCDS integration opportunities**

| <b>Code</b>                             | <b>Definition</b>                                            | <b>Purpose/meaning of code</b>                  | <b>In vivo description</b>                                                                                                           |
|-----------------------------------------|--------------------------------------------------------------|-------------------------------------------------|--------------------------------------------------------------------------------------------------------------------------------------|
| 1. Presence of health extension program | Participants explain the support of health extension program | Identifying supportive health extension program | Health extension workers guided me on screening Diabetes mellitus after I increased body weight when I was on Tuberculosis treatment |

|                                                          |                                                                             |                                                               |                                                                                                                                                                                            |
|----------------------------------------------------------|-----------------------------------------------------------------------------|---------------------------------------------------------------|--------------------------------------------------------------------------------------------------------------------------------------------------------------------------------------------|
| 2. Availability of NGOs                                  | Participants explain role of NGOS                                           | Identifying supportive NGOs                                   | Even if in our site there is no institutional organization for integration , there have been challenge TB and Rich TB programs, and NCDs family health programs separately                 |
| 3. Presence of Community health care insurance           | Participants describe their community health care insurance                 | Identifying supportive health care insurance                  | Community health care insurance program was available for all poor rural people and for all people willing to register in our site to get free health services                             |
| 4. Presence of association for diabetes mellitus         | Participants describe the diabetes mellitus association                     | Identifying supportive associations                           | Basically in health institutions, there is no free drug for NCD patients, however in our health facilities especially in Hospitals for DM and other NCDs we established the DM association |
| 5. Presence of Assigned focal persons                    | Participants describe their focal person support                            | Identifying assigned focal persons                            | we have assigned all focal person medical doctors at our health centre to increase the service and the needs of the patients                                                               |
| 6. Availability of trained stakeholder                   | Respondents describe their stakeholder skill                                | Identifying trained stakeholder                               | Trained stakeholders had planned to give community awareness and cooperate the work as a new initiative.                                                                                   |
| 7. Availability of guidelines and information system     | Participants describe the availability of guidelines and information system | Identifying availability of guidelines and information system | We do have NCD and TB integration guidelines and DHIS even if it has no integration system at the organizational and community level                                                       |
| 8. Presence of Compatible tuberculosis program structure | Participants describe program compatibility                                 | Identifying compatibility of the TB program                   | This work of integration strengthens the work of TB, not replaces it, because it is compatible with TB's structure and functionality                                                       |
